# Supplementary material for: Genetic profiles of 103,106 individuals in the Taiwan Biobank provide insights into the health and history of Han Chinese
Source: PubMed Central journal article supplement (PMC7878858; doi:10.1038/s41525-021-00178-9), 2021-02-11
Supplement: 41525_2021_178_MOESM1_ESM.pdf [file 41525_2021_178_MOESM1_ESM.pdf]

# Supplemental Text

## **CNV Analysis**

To assess the performance TWBv2 probes for known CNV analysis, we genotyped 96 individuals with SNP6.0 array data obtained previously for comparison. Of these, 31 were patients with confirmed chromosomal aberrations, 4 were healthy controls with induced genomic alterations during cell culture, and the remaining 61 were healthy controls without apparent chromosomal abnormalities. The CNVs detected by TWBv2 were compared to the ones that were previously identified using the ThermoFisher SNP6.0 array for the same individuals in three sets of analyses. First, we examined whether the known chromosomal aberrations from the 31 individuals based on SNP6.0 array analysis could be detected by TWBv2 array. Forty out of the 41 chromosomal aberrations (ranging from 108 kb to 26 Mb in length) previously found in these individuals by the SNP6.0 array were successfully genotyped on the TWBv2 array (Table S4). The one (615 kb) region not detected by the TWBv2 array was located at the telomere of Chr1p and was split into multiple pieces in the GRCh38/hg38 genome assembly. Second, we examined whether the genomic alterations in the EBV-transformed cells could be detected by the TWBv2 array. Because these genomic alterations were induced during cell culturing, the abnormalities were somatic and could be mosaic. Three chromosomal regions with gain or loss signals were clearly detected by TWBv2 (Figure S5a-S5c). However, the regions were divided into several segments because intensities of some SNPs did not pass the threshold for CNV calls. Third, we assessed the performance of the TWBv2 array in identifying regions of copy-neutral loss-of-heterozygosity (LOH). Applying the analytical approach we developed to detect LOH or CNV based on variation of B allele frequencies (BAF) over a region, we were able to identify samples consist of a mixture of cells with and without LOH (Figure S5d). These results show that the TWBv2 array can be used to detect germ-line as well as somatic genomic aberrations including deletions, duplications, and LOH.

## Supplemental methods

### **Methods for CNV Analysis**

CNV analysis and LOH analysis of the 96 test samples were carried out using Axiom Processing Tool v.2.11.1 (Thermo Fisher) with default setting. All the samples passed quality control and were included for reference set establishment. DNA segments with copy number state other than 2, probe numbers at least 20, and length at least 20 kb were selected for further analysis. The target chromosomal aberrant regions reported by SNP6.0 have been liftover from NCBI36/hg18 to GRCh38/hg38 for comparison. Among the forty-one target regions, four were failed to be converted to new version of human genome assembly because the regions were split in GRh38/hg38 assembly. Consistency between the target regions and CNV segments detected by TWB2.0 was defined as a CNV segment covering at least 50% of a given target region from the same individual. When there was more than one CNV segment overlapped with a target region, the flanking CNV segments were merged for coverage analysis.

## Supplemental figures

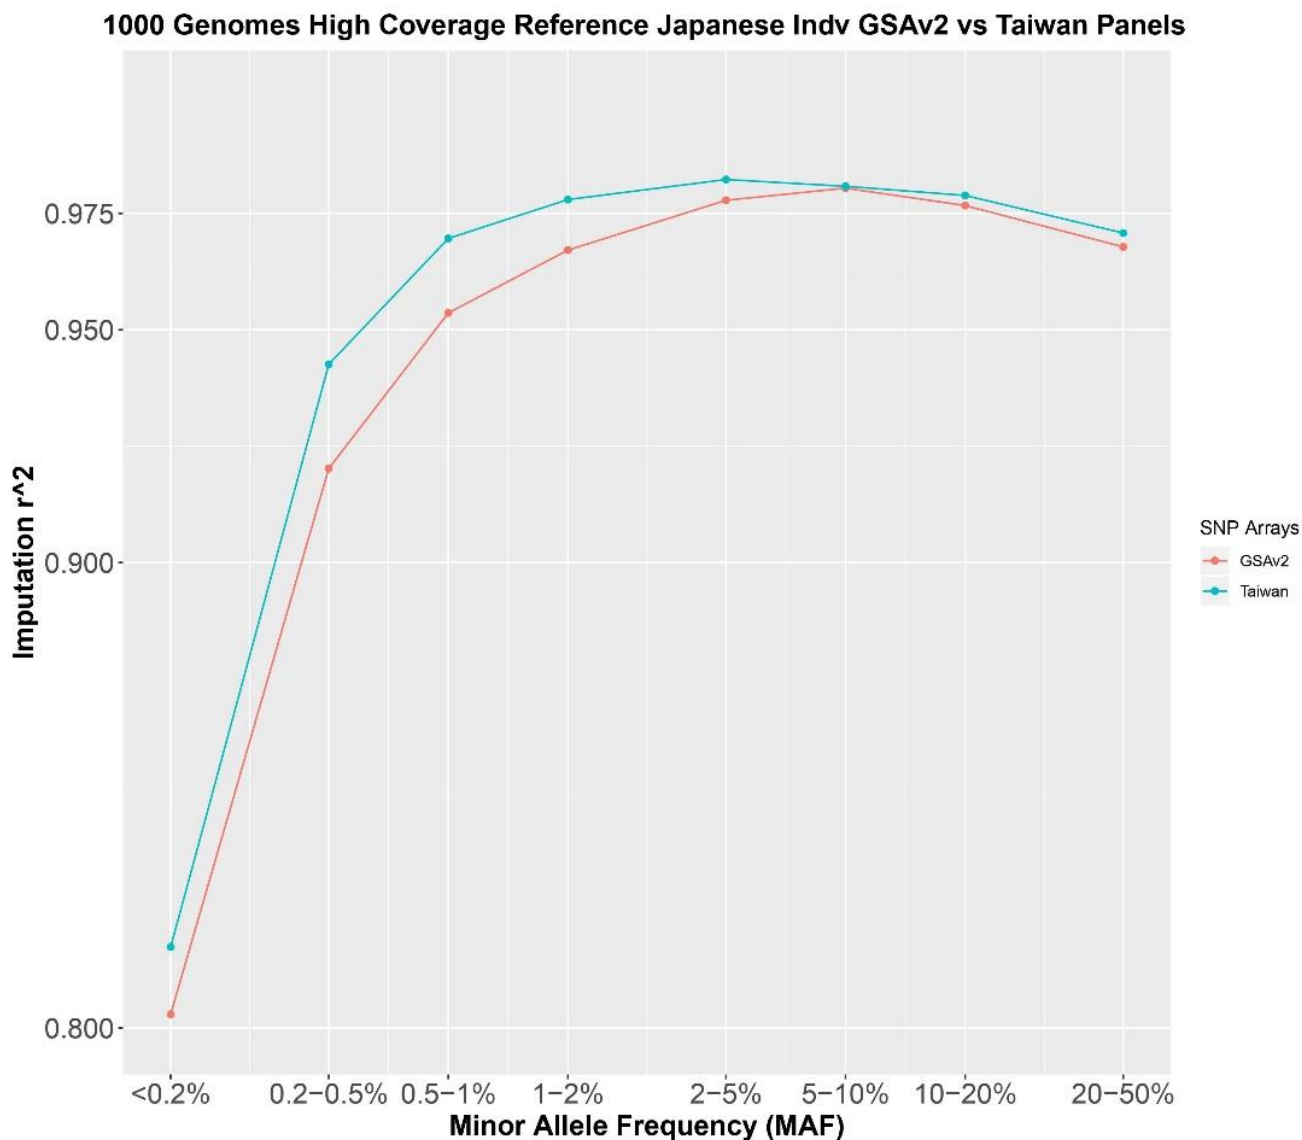

**Supplementary Figure 1. Comparison of imputation accuracy (as measured by  $r^2$  between imputed and actual genotypes), stratified by MAF, using the TWBv2 array versus the GSA2 array. For both, the reference panel is the 1000 Genomes Project high-coverage data and the test samples are the Japanese samples from the GenomeAsia 100K Consortium study.**

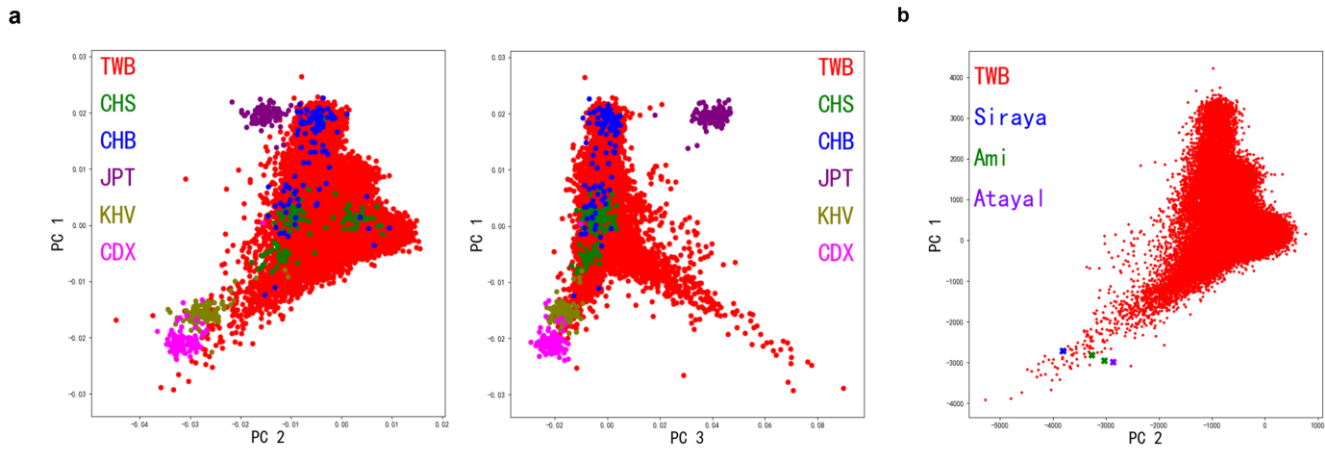

**Supplementary Figure 2. PCA of the TWB participants with samples from 1000 genome projects and SGDP.** (a) PCA plots for from 1000 genome project samples and TWB (CDX:Chinese Dai in Xishuangbanna, China; CHB: Han Chinese in Beijing, China; CHS: Southern Han Chinese; JPT: Japanese in Tokyo, Japan; KHV: Kinh in Ho Chi Minh City, Vietnam; TWB: Taiwan Biobank Participants). (b) PCA analysis showed that a Siraya in the TWB cohort was clustered with three Taiwanese indigenous people (2 Amei and 1 Atayal) from SGPD. PC1 and PC2 are the first two components derived from the PCA.

### Novel alleles vs. Distance from Taiwan

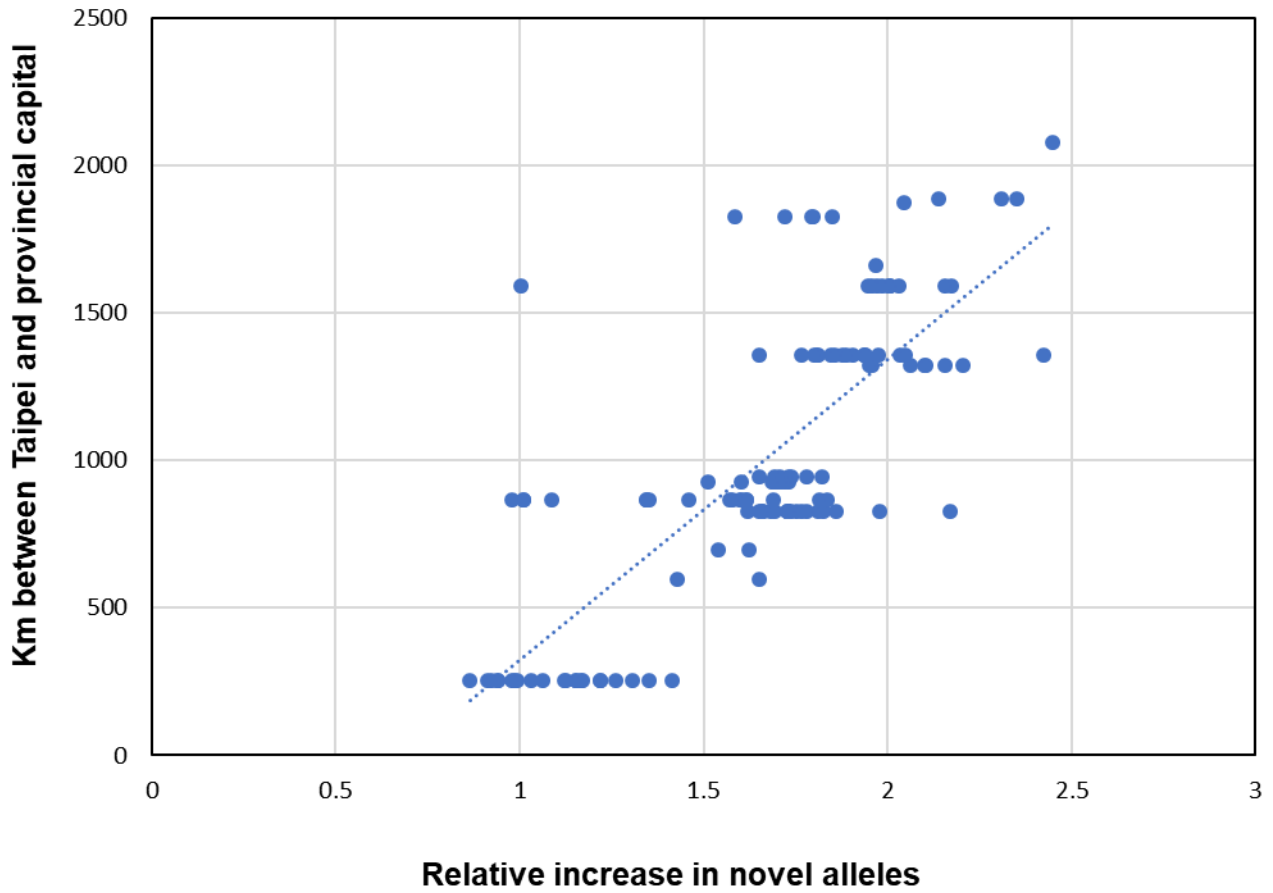

Supplementary Figure 3. Scatterplot of relative increase in novel alleles versus distance between a sample's provincial capital and Taipei.

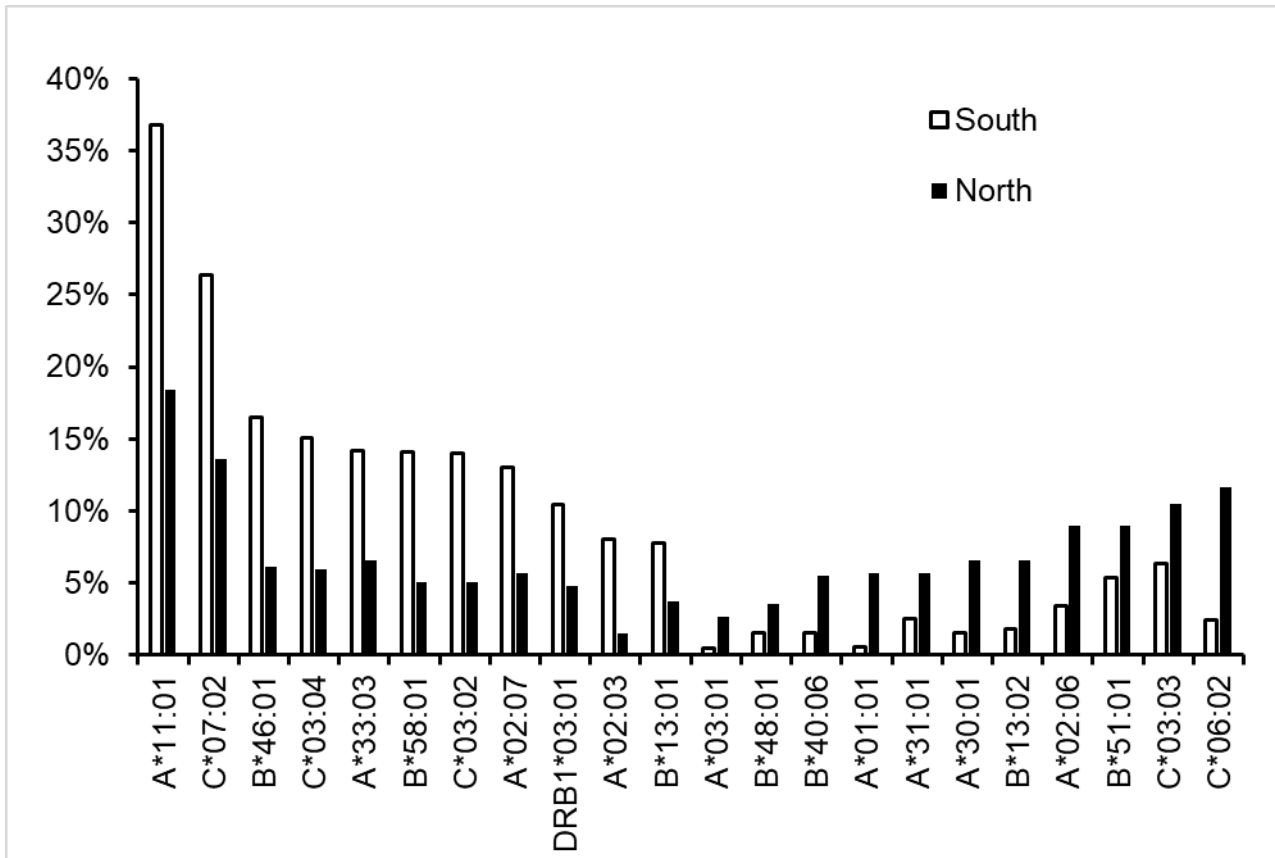

**Supplementary Figure 4. Allele frequency and distribution of imputed high-resolution HLA types in TWB participants based on geographic origins.**

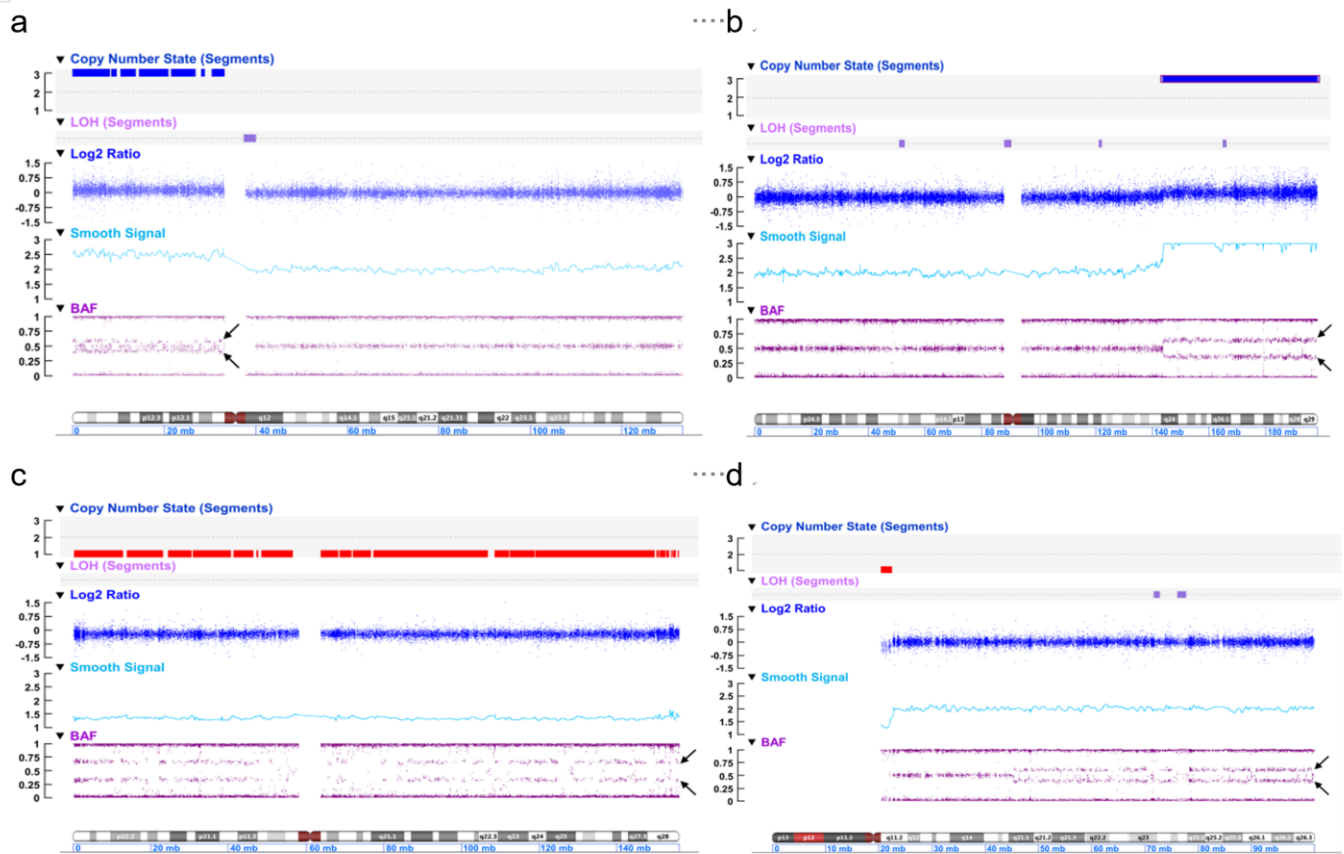

**Supplementary Figure 5. Mosaic chromosomal abnormalities of EBV-transformed B cells detected by TWB2.0 array.** (a). Mild mosaic duplication of Chr12p is detected based on the presence of several segments with duplication signals and abnormal B-allele frequency (BAF) within the regions. (b). Severe mosaic duplication of Chr3q24-q29 is detected based on the presence of one segment with duplication signals. (c). Moderate mosaic deletion of ChrX is detected based on the presence of multiple segments with deletion signals and obvious abnormal BAF. (d). Mild mosaic copy-neutral LOH is detected based on the presence of abnormal BAF. Arrows indicate SNPs with abnormal BAF.

## Supplemental tables

Supplementary Table 1. Content of TWBv2 array

| Category                          | Variants |
|-----------------------------------|----------|
| GWAS grid                         | ~415,000 |
| CNV                               | ~57,000  |
| X chromosome                      | ~6,800   |
| Y chromosome                      | ~14,000  |
| Mitochondrial                     | ~800     |
| Health status-associated variants | ~2,000   |
| GWAS catalog                      | ~40,000  |
| ClinVar                           | ~56,000  |
| ACMG                              | ~16,000  |
| Pharmacogenetics/ADME             | ~4,100   |
| HLA                               | ~9000    |
| KIR                               | ~1400    |
| Pathogenic or likely pathogenic   | ~44,000  |
| Autosomal dominant                | ~2700    |
| Autosomal recessive               | ~4000    |

Supplementary Table 2. Targeted CNV regions

| Chrom | Start_position | End_position | Gene    | Chrom | Start_position | End_position | Gene    |
|-------|----------------|--------------|---------|-------|----------------|--------------|---------|
| 1     | 16935740       | 16968705     |         | 5     | 1685479        | 2197089      |         |
| 1     | 145809392      | 145829793    |         | 5     | 122560082      | 123202432    |         |
| 1     | 145917713      | 145927678    | RBM8A   | 5     | 142628184      | 142960105    |         |
| 1     | 146147883      | 148893213    |         | 5     | 148002330      | 148586891    |         |
| 1     | 152436463      | 152469824    |         | 5     | 172276341      | 172744530    |         |
| 1     | 174833002      | 174833691    |         | 6     | 113434010      | 116771846    |         |
| 1     | 244716010      | 245697402    | HNRNPU  | 6     | 161347419      | 162259273    | PARK2   |
| 1     | 244716010      | 245697402    |         | 6     | 166409363      | 166906451    | RPS6KA2 |
| 1     | 247757461      | 247758406    | OR1C1   | 7     | 1164205        | 1598860      |         |
| 1     | 248238928      | 248239864    | OR2M4   | 7     | 15843927       | 16300363     |         |
| 1     | 248592829      | 248593768    | OR2T10  | 7     | 39097461       | 39506174     |         |
| 2     | 15598026       | 15795714     |         | 7     | 65373855       | 65401085     |         |
| 2     | 49918504       | 51032536     | NRXN1   | 7     | 73328061       | 74760692     | STX1A   |
| 2     | 74630228       | 75097478     |         | 7     | 73328061       | 74760692     | GTF2I   |
| 2     | 90082547       | 90095707     |         | 7     | 93743299       | 93772662     |         |
| 2     | 91613447       | 91948753     |         | 7     | 105036075      | 105458896    |         |
| 2     | 97195895       | 97200085     |         | 7     | 116725042      | 116803220    |         |
| 2     | 162696789      | 163351864    |         | 7     | 119673168      | 120603257    |         |
| 2     | 201652291      | 201663822    |         | 7     | 127626828      | 128029951    |         |
| 2     | 214995983      | 215467926    |         | 7     | 145367649      | 146253362    |         |
| 2     | 238244037      | 238290102    | PER2    | 7     | 156994532      | 159327018    | VIPR2   |
| 2     | 239048167      | 239401654    | HDAC4   | 8     | 612629         | 1209817      |         |
| 2     | 241849880      | 241858908    | PDCD1   | 8     | 2935352        | 4994972      | CSMD1   |
| 3     | 1092575        | 1404217      | CNTN6   | 8     | 6406591        | 6648505      | MCPH1   |
| 3     | 19242123       | 19803162     |         | 8     | 10764960       | 10839899     | PINX1   |
| 3     | 75590344       | 75881769     |         | 8     | 12685212       | 12729881     |         |
| 3     | 100128858      | 100580485    |         | 8     | 13420325       | 13984283     |         |
| 3     | 130088069      | 130196115    |         | 8     | 16107877       | 16567490     | MSR1    |
| 3     | 195746764      | 195812277    | MUC4    | 8     | 18527300       | 19084730     | PSD3    |
| 3     | 196018732      | 197628732    | DLG1    | 8     | 74880842       | 75321984     |         |
| 3     | 196018732      | 197628732    | TM4SF19 | 8     | 96158782       | 96524921     |         |
| 3     | 196018732      | 197628732    |         | 8     | 99013266       | 99877580     |         |
| 4     | 2741647        | 2756376      | TNIP2   | 9     | 841690         | 969090       |         |
| 4     | 3884069        | 4188833      |         | 9     | 4533853        | 4538277      |         |
| 4     | 9484428        | 9742967      |         | 9     | 22190563       | 22988893     |         |
| 4     | 44007184       | 44584699     |         | 9     | 24466997       | 24495716     |         |
| 4     | 67612651       | 67701179     | UBA6    | 9     | 122660145      | 123184806    |         |
| 4     | 68506273       | 68544493     |         | 9     | 135702184      | 135795508    | KCNT1   |



| Chrom | Start_position | End_position | Gene     | Chrom | Start_position | End_position | Gene     |
|-------|----------------|--------------|----------|-------|----------------|--------------|----------|
| 9     | 137138389      | 137168762    | GRIN1    | 16    | 29506378       | 30191178     | SEZ6L2   |
| 9     | 137618962      | 137870016    | EHMT1    | 16    | 29506378       | 30191178     | KCTD13   |
| 9     | 137877788      | 138124624    | CACNA1B  | 16    | 29506378       | 30191178     | MAPK3    |
| 10    | 34381600       | 35039494     |          | 16    | 30698208       | 30741409     | SRCAP    |
| 10    | 49107035       | 49671832     |          | 16    | 31106106       | 31112791     | BCKDK    |
| 10    | 126450084      | 126909264    |          | 16    | 31549193       | 31645257     |          |
| 11    | 4545190        | 4546144      | OR52M1   | 16    | 34061880       | 34208804     |          |
| 11    | 20004327       | 20966564     |          | 16    | 34962968       | 35268851     |          |
| 11    | 31240619       | 31688096     |          | 16    | 75528529       | 75535247     | CHST5    |
| 12    | 6942977        | 6946003      | C12orf57 | 16    | 75536743       | 75556286     | TMEM231  |
| 12    | 7129697        | 7158945      | CLSTN3   | 16    | 76277216       | 76560750     | CNTNAP4  |
| 12    | 8225643        | 8384004      |          | 16    | 77247812       | 77435114     | ADAMTS18 |
| 12    | 33599395       | 34379787     |          | 17    | 930550         | 1613186      | YWHAE    |
| 12    | 128126688      | 128487159    |          | 17    | 2059838        | 2303775      | SMG6     |
| 12    | 130094548      | 130645732    |          | 17    | 2384059        | 2401118      | MNT      |
| 13    | 19837453       | 19863633     |          | 17    | 2593209        | 2685615      | PAFAH1B1 |
| 14    | 21385193       | 21456126     | CHD8     | 17    | 17494436       | 17496395     | RASD1    |
| 14    | 22773221       | 22829820     | SLC7A7   | 17    | 17681472       | 17811453     | RAI1     |
| 14    | 23960089       | 24044696     |          | 17    | 21376196       | 21419872     | KCNJ12   |
| 14    | 70688249       | 71233331     |          | 17    | 22667724       | 22688611     |          |
| 14    | 98588943       | 98696797     |          | 17    | 39626739       | 39636626     | PPP1R1B  |
| 15    | 22773062       | 22867050     | NIPA1    | 17    | 79892322       | 80316385     |          |
| 15    | 22773062       | 22867050     | NIPA2    | 17    | 80977353       | 81538598     |          |
| 15    | 22868385       | 23074431     | CYFIP1   | 18    | 7079986        | 7563167      |          |
| 15    | 22868385       | 23074431     | TUBGCP5  | 18    | 47227732       | 47785629     |          |
| 15    | 23643543       | 23647846     | MAGEL2   | 18    | 55341734       | 55477638     |          |
| 15    | 24823636       | 24978723     | SNRPN    | 19    | 27525358       | 27564507     |          |
| 15    | 25333727       | 25439056     | UBE3A    | 20    | 12761990       | 13357690     |          |
| 15    | 28464134       | 28828395     |          | 20    | 13995368       | 16053197     | MACROD2  |
| 15    | 30840505       | 32166459     | CHRNA7   | 20    | 24993133       | 25736933     |          |
| 15    | 30840505       | 32166459     | FAN1     | 20    | 59447284       | 60432815     |          |
| 15    | 30840505       | 32166459     | TRPM1    | 21    | 13084083       | 13221902     |          |
| 15    | 32172522       | 32565269     |          | 21    | 21898323       | 22362794     |          |
| 15    | 32853510       | 33253897     |          | 22    | 18157533       | 18190106     |          |
| 16    | 1153240        | 1221772      | CACNA1H  | 22    | 18912773       | 18936553     | PRODH    |
| 16    | 2047464        | 2088720      | TSC2     | 22    | 19179472       | 19291716     | CLTCL1   |
| 16    | 2253115        | 2268412      | RNPS1    | 22    | 19756702       | 19783222     | TBX1     |
| 16    | 3725053        | 3880726      | CREBBP   | 22    | 19783594       | 19854939     | GNB1L    |
| 16    | 6019093        | 7713338      | RBFOX1   | 22    | 20979461       | 20999038     | LZTR1    |
| 16    | 28811178       | 29041178     |          | 22    | 21111546       | 21257048     |          |

| Chrom | Start_position | End_position | Gene     | Chrom | Start_position | End_position | Gene   |
|-------|----------------|--------------|----------|-------|----------------|--------------|--------|
| 22    | 21562852       | 21953147     |          | 23    | 150766335      | 150898816    | CD99L2 |
| 22    | 48992889       | 50750066     | CHKB     | 23    | 152166233      | 152451359    | GABRA3 |
| 22    | 48992889       | 50750066     | MAPK12   | 23    | 152638182      | 152657534    | GABRQ  |
| 22    | 48992889       | 50750066     | MAPK8IP2 | 23    | 153688098      | 153696593    | SLC6A8 |
| 22    | 48992889       | 50750066     | SBF1     | 23    | 153704720      | 156004181    | HCFC1  |
| 22    | 48992889       | 50750066     | SHANK3   | 23    | 153704720      | 156004181    | MECP2  |
| 22    | 50648836       | 50796015     |          | 23    | 153704720      | 156004181    | PDZD4  |
| 23    | 6022606        | 8177680      |          | 23    | 153704720      | 156004181    | PLXNA3 |
| 23    | 57357614       | 58411744     |          | 23    | 153704720      | 156004181    | RAB39B |
| 23    | 68223324       | 68681109     |          | 23    | 153704720      | 156004181    | RPL10  |
| 23    | 148500618      | 149000663    | AFF2     | 23    | 153704720      | 156004181    | TMLHE  |
| 23    | 149712024      | 149717267    |          |       |                |              |        |

Supplementary Table 3. Concordance of genotypes by TWBv2 Array and Sequencing.

| Minor Allele<br>Frequency (%) | Number of<br>Markers | Concordance<br>Rate (S.D.) |
|-------------------------------|----------------------|----------------------------|
| 0                             | 110,497              | 99.6% (5.7)                |
| 0.1 - 1                       | 47,631               | 99.8% (3.8)                |
| 1 - 5                         | 204,981              | 99.9% (0.9)                |
| 5 - 10                        | 73,263               | 99.8% (1.9)                |
| 10 - 20                       | 77,125               | 99.8% (2.5)                |
| 29 - 30                       | 54,953               | 99.7% (3.1)                |
| 30 - 40                       | 47,449               | 99.6% (4.0)                |
| 40 - 50                       | 44,707               | 99.4% (6.3)                |
| Total                         | 660,606              | 99.8% (3.5)                |

S.D.: standard deviation

Supplementary Table 4. CNV detection by 6.0 SNP array and TWBv2 SNP array.

| Case ID | Sex | Cytoband | SNP 6.0                |           |           |               | TWBv2     |           |         |           |
|---------|-----|----------|------------------------|-----------|-----------|---------------|-----------|-----------|---------|-----------|
|         |     |          | Start                  | End       | Size (bp) | Gain/<br>Loss | Start     | End       | Markers | Size (bp) |
| 203897  | M   | 7p21.1   | 15843927               | 16300363  | 456436    | Gain          | 15843802  | 16300709  | 79      | 456907    |
| 203897  | M   | 12q24.32 | 128126688              | 128487159 | 360471    | Gain          | 128119145 | 128487240 | 180     | 368095    |
| 206973  | M   | 18q21.1  | 47227732               | 47785629  | 557897    | Loss          | 47227670  | 47806193  | 131     | 578523    |
| 215325  | F   | 5q35.1   | 172276341              | 172744530 | 468189    | Loss          | 172275841 | 172745030 | 173     | 469189    |
| 215325  | F   | 16q21    | 64086661               | 90221115  | 26134454  | Gain          | 64069732  | 90215023  | 8775    | 26145291  |
| 217294  | M   | 16p11.2  | 29506378               | 30178709  | 672331    | Loss          | 29580435  | 30191213  | 404     | 610778    |
| 218348  | M   | 16p13.3  | 10001                  | 1543842   | 1533841   | Loss          | 29043     | 1367092   | 645     | 1338049   |
| 218867  | M   | Xq28     | 153704720              | 156004181 | 2299461   | Gain          | 153687598 | 156008488 | 1792    | 2320890   |
| 220156  | F   | 1p36.33  | Split in Hg38 Assembly |           |           | Loss          | 784860    | 1915143   | 420     | 1130283   |
| 220156  | F   | 20p12.1  | 12761990               | 13357690  | 595700    | Loss          | 12761490  | 13357786  | 188     | 596296    |
| 225877  | M   | 16p11.2  | 29641167               | 30179356  | 538189    | Loss          | 29580435  | 30159695  | 406     | 579260    |
| 226996  | F   | 5q31.3   | 142628184              | 142960105 | 331921    | Gain          | 142619401 | 143013997 | 160     | 394596    |
| 226996  | F   | 5q33.1   | 148002330              | 148586891 | 584561    | Gain          | 147998200 | 148587391 | 296     | 589191    |
| 228205  | M   | 20p11.21 | 24993133               | 25736933  | 743800    | Loss          | 24992611  | 25685798  | 137     | 693187    |
| 228263  | F   | 2p24.3   | 15598026               | 15795714  | 197688    | Gain          | 15597574  | 15796184  | 110     | 198610    |
| 228432  | F   | 6q22.1   | 113620909              | 116771846 | 3150937   | Gain          | 113603564 | 116771942 | 477     | 3168378   |
| 228488  | F   | 22q11.21 | Split in Hg38 Assembly |           |           | Loss          | 18889117  | 21097474  | 1108    | 2208357   |
| 228838  | M   | 6q21     | 113434010              | 116321905 | 2887895   | Loss          | 113433933 | 116310960 | 370     | 2877027   |
| 229000  | F   | 11p15.1  | 20004327               | 20966564  | 962237    | Gain          | 20015574  | 20970661  | 291     | 955087    |
| 229602  | M   | 3q12.1   | 100128858              | 100580485 | 451627    | Gain          | 100123613 | 100561159 | 80      | 437546    |
| 229604  | M   | 1q44     | 245150172              | 245697402 | 547230    | Gain          | 245150423 | 245697748 | 278     | 547325    |
| 229928  | F   | 1q44     | 244716010              | 245263357 | 547347    | Loss          | 244722626 | 245268001 | 269     | 545375    |
| 230277  | F   | 5q23.2   | 122560082              | 123202432 | 642350    | Gain          | 122559645 | 123202932 | 155     | 643287    |
| 230667  | M   | 17q25.3  | 79892322               | 80316385  | 424063    | Gain          | 79874333  | 80319145  | 374     | 444812    |
| 231447  | M   | 2q24.2   | 162696789              | 163351864 | 655075    | Gain          | 162696384 | 163351945 | 98      | 655561    |
| 231450  | F   | 18q21.2  | 55341734               | 55477638  | 135904    | Loss          | 55340922  | 55474417  | 74      | 133495    |
| 231515  | M   | 14q32.2  | 98588943               | 98696797  | 107854    | Loss          | 98588943  | 98691093  | 51      | 102150    |
| 231515  | M   | 14q32.2  | 98993937               | 100426412 | 1432475   | Loss          | 98984298  | 100427519 | 370     | 1443221   |
| 232616  | M   | 8q22.1   | 96158782               | 96524921  | 366139    | Loss          | 96178811  | 96515450  | 65      | 336639    |

|               |   |             |                        |           |         |      |           |           |      |         |
|---------------|---|-------------|------------------------|-----------|---------|------|-----------|-----------|------|---------|
| <b>234495</b> | F | 10q11.22    | 49107035               | 49671832  | 564797  | Gain | 49105576  | 49671832  | 334  | 566256  |
| <b>234495</b> | F | 21q21.1     | 21898323               | 22362794  | 464471  | Gain | 21897823  | 22363294  | 141  | 465471  |
| <b>235423</b> | M | 22q11.21    | Split in Hg38 Assembly |           |         | Loss | 18905062  | 18933784  | 72   | 28722   |
| <b>235423</b> | M | 22q11.21    | 20756002               | 21077265  | 321263  | Loss | 18948253  | 21098561  | 1039 | 2150308 |
| <b>237718</b> | M | 11p13       | 31240619               | 31688096  | 447477  | Loss | 31240618  | 31701967  | 85   | 461349  |
| <b>237886</b> | F | 7q36.3-qter | 156994532              | 159327018 | 2332486 | Gain | 157011816 | 159329032 | 585  | 2317216 |
| <b>237886</b> | F | 10p14-pter  | 14061                  | 7627087   | 7613026 | Loss | 73872     | 7627589   | 2678 | 7553717 |
| <b>238985</b> | F | 1p36.33     | Split in Hg38 Assembly |           |         |      |           |           |      |         |
| <b>238985</b> | F | 1p36.33     | 690078                 | 3827697   | 3137619 | Loss | 784860    | 3826707   | 1288 | 3041847 |
| <b>238985</b> | F | 1p36.32     | 4662167                | 5746289   | 1084122 | Loss | 4662604   | 5745451   | 441  | 1082847 |
| <b>239225</b> | F | 14q24.2     | 70688249               | 71233331  | 545082  | Gain | 70683704  | 71244908  | 168  | 561204  |
| <b>239772</b> | F | 2q35        | 214995983              | 215467926 | 471943  | Gain | 215007788 | 215467943 | 121  | 460155  |

---

Supplementary Table 5. Population frequencies of known disease susceptibility variants.

|                              | <b>Disease</b>                                                                                              | <b>Gene</b> | <b>Variant ID</b> | <b>Allele frequency</b> |
|------------------------------|-------------------------------------------------------------------------------------------------------------|-------------|-------------------|-------------------------|
| <b>Cancer susceptibility</b> | Adenomatous polyposis coli                                                                                  | APC         | rs1554086805      | 0.11%                   |
|                              |                                                                                                             |             | rs1554087314      | 0.12%                   |
|                              | Breast-ovarian cancer, familial 1                                                                           | BRCA1       | rs886040243       | 0.11%                   |
|                              |                                                                                                             |             | rs80356891        | 0.12%                   |
|                              | Breast-ovarian cancer, familial 2                                                                           | BRCA2       | rs80359373        | 0.15%                   |
|                              | Hereditary cancer-predisposing syndrome                                                                     | CHEK2       | rs786202601       | 0.31%                   |
|                              |                                                                                                             |             | rs864622613       | 0.13%                   |
|                              |                                                                                                             | RAD51D      | rs753862052       | 0.12%                   |
|                              | Juvenile polyposis syndrome                                                                                 | SMAD4       | rs876660720       | 0.10%                   |
|                              | Li-Fraumeni syndrome 1                                                                                      | TP53        | rs397516436       | 0.15%                   |
|                              | Lynch syndrome                                                                                              | MSH6        | rs876661171       | 0.42%                   |
|                              | MYH-associated polyposis                                                                                    | MUTYH       | rs762307622       | 0.11%                   |
|                              | Neuroblastoma                                                                                               | KIF1B       | rs121908163       | 0.41%                   |
|                              | PTEN hamartoma tumor syndrome                                                                               | PTEN        | rs1554825615      | 0.10%                   |
| Prostate cancer              | EHBP1                                                                                                       | rs721048    | 3.88%             |                         |
| <b>Autosomal dominant</b>    | Cerebral autosomal dominant arteriopathy with subcortical infarcts and leukoencephalopathy type 1 (CADASIL) | NOTCH3      | rs201118034       | 0.48%                   |

|                                             |                                          |             |             |       |
|---------------------------------------------|------------------------------------------|-------------|-------------|-------|
| DFNA2 Nonsyndromic Hearing Loss             | KCNQ4                                    | rs80358273  | 0.62%       |       |
|                                             | APOB                                     | rs144467873 | 0.19%       |       |
| Familial hypercholesterolemia               | LDLR                                     | rs730882109 | 0.18%       |       |
|                                             |                                          | rs749038326 | 0.09%       |       |
| Familial hypertrophic cardiomyopathy        | TCAP                                     | rs778568339 | 0.23%       |       |
|                                             | SPINK1                                   | rs148954387 | 0.43%       |       |
| Hereditary pancreatitis                     | PRSS1                                    | rs387906698 | 0.10%       |       |
| Maturity-onset diabetes of the young type 3 | HNF1A                                    | rs776793516 | 0.11%       |       |
| Spastic paraplegia 4                        | SPAST                                    | rs864622162 | 0.14%       |       |
| <b>Autosomal recessive</b>                  | Joubert Syndrome                         | CEP290      | rs760540562 | 0.25% |
|                                             | Meckel syndrome                          | MKS1        | rs762668200 | 0.15% |
|                                             | Primary Autosomal Recessive Microcephaly | MCPH1       | rs541042265 | 0.13% |
|                                             | Congenital hypothyroidism                | TSHR        | rs189261858 | 0.36% |
|                                             | Total iodide organification defect       | TPO         | rs770781635 | 0.28% |
|                                             | ABCA4-Related Disorders                  | ABCA4       | rs752786160 | 0.17% |
|                                             | Bestrophinopathy                         | BEST1       | rs200277476 | 0.15% |
|                                             | Cone-rod dystrophy and hearing loss 1    | CEP78       | rs745750156 | 0.08% |
|                                             | Nonsyndromic hearing loss and deafness   | GJB2        | rs80338943  | 0.69% |
|                                             |                                          |             | rs111033204 | 0.10% |
| Pendred syndrome                            | SLC26A4                                  | rs111033313 | 0.76%       |       |
|                                             |                                          | rs121908362 | 0.10%       |       |

|                                              |              |             |       |
|----------------------------------------------|--------------|-------------|-------|
| Usher syndrome                               | USH2A        | rs201527662 | 0.25% |
| beta Thalassemia                             | HBB          | rs80356821  | 0.29% |
| Hereditary factor XI deficiency disease      | F11          | rs770505620 | 0.19% |
| Carnitine palmitoyltransferase II deficiency | CPT2         | rs74315298  | 0.10% |
| Citrullinemia type II                        | SLC25A1<br>3 | rs80338720  | 0.55% |
|                                              |              | rs80338717  | 0.42% |
| Congenital Disorder of Glycosylation 1a      | PMM2         | rs150719105 | 0.20% |
| Gaucher disease                              | GBA          | rs76539814  | 0.11% |
| Glutaric aciduria 1                          | GCDH         | rs199999619 | 0.19% |
| Glycogen storage disease 1A                  | G6PC         | rs1801176   | 0.10% |
| Methylmalonic aciduria                       | MMUT         | rs753288303 | 0.10% |
| Mucopolysaccharidosis type III               | GNPTAB       | rs397507447 | 0.13% |
|                                              |              | rs200646278 | 0.09% |
| Phenylketonuria                              | PAH          | rs76687508  | 0.24% |
| Pompe disease                                | GAA          | rs28940868  | 0.19% |
| Primary carnitine deficiency                 | SLC22A5      | rs60376624  | 0.28% |
|                                              |              | rs121908893 | 0.18% |
| PTPS deficiency                              | PTS          | rs104894275 | 0.14% |
| Sialidosis                                   | NEU1         | rs398123392 | 0.18% |
| Sitosterolemia                               | ABCG5        | rs119480069 | 0.33% |
| Waardenburg syndrome                         | EDNRB        | rs781214034 | 0.20% |



|                                               |           |  |             |        |
|-----------------------------------------------|-----------|--|-------------|--------|
|                                               |           |  | rs541208827 | 0.30%  |
|                                               |           |  | rs750019452 | 0.28%  |
| Wilson disease                                | ATP7B     |  | rs28942074  | 0.19%  |
|                                               |           |  | rs779323689 | 0.12%  |
| Hereditary spastic paraplegia 5               | CYP7B1    |  | rs200737038 | 0.42%  |
| Hereditary spastic paraplegia 15              | ZFYVE26   |  | rs769329153 | 0.11%  |
| Krabbe Disease                                | GALC      |  | rs138577661 | 0.84%  |
| Limb-girdle muscular dystrophy 2A             | TRAPPC1 1 |  | rs397509417 | 0.10%  |
| Autoimmune polyendocrinopathy syndrome type I | AIRE      |  | rs199612115 | 0.16%  |
| Bardet-Biedl syndrome                         | BBS2      |  | rs773862084 | 0.19%  |
| Cystic fibrosis                               | CFTR      |  | rs115545701 | 0.11%  |
| Nagashima-type palmoplantar keratosis         | SERPINB 7 |  | rs142859678 | 0.72%  |
| <b>X-linked recessive</b>                     |           |  | rs72554664  | 0.69%  |
|                                               |           |  | rs137852331 | 0.27%  |
| G6PD deficiency                               | G6PD      |  | rs137852340 | 0.21%  |
|                                               |           |  | rs137852342 | 0.18%  |
|                                               |           |  | rs137852341 | 0.17%  |
| <b>Disease risk</b>                           |           |  | rs429358    | 8.65%  |
| Alzheimer's disease                           | APOE      |  | rs7412      | 7.36%  |
| Hyperuricemia                                 | ABCG2     |  | rs2231142   | 31.40% |

---

|                           |                 |       |        |
|---------------------------|-----------------|-------|--------|
| Alcohol-flushing reaction | ALDH2           | rs671 | 28.00% |
| Ankylosing spondylitis    | HLA-<br>B*27:04 |       | 3.50%  |
| Grave's disease           | HLA-<br>B*46:01 |       | 13.30% |

---

Supplementary Table 6. Variants associated with drug metabolism and adverse drug reactions.

| Biomarker   | Variant     | Enzyme activity/<br>ADR relationship | Allele      | Drugs                 | Allele<br>frequency |
|-------------|-------------|--------------------------------------|-------------|-----------------------|---------------------|
| CYP2B6      | rs3745274   | Decreased or no<br>function          |             | Efavirenz             | 18.8%               |
| CYP2C9      | rs1057910   | Decreased function                   | *3          | Celecoxib             | 3.3%                |
| CYP2C19     | rs4244285   | No function                          | *2          | Citalopram            | 31.9%               |
|             | rs4986893   | No function                          | *3          | Clobazam              | 5.2%                |
|             | rs72552267  | No function                          | *6          | Clopidogrel           | 0.2%                |
| CYP3A5      | rs776746    | No function                          | *3          | Tacrolimus            | 71.6%               |
| HLA-A*3101  |             | Risk                                 |             | Carbamazepine         | 2.1%                |
| HLA-B*1502  |             | Risk                                 |             | Carbamazepine         | 4.3%                |
| HLA-B*5701  |             | Risk                                 |             | Abacavir              | 0.4%                |
| HLA-B*5801  |             | Risk                                 |             | Allopurinol           | 10.8%               |
| IFNL3/IL28B | rs12979860  | Unfavorable<br>response genotype     |             | Peginterferon<br>Alfa | 5.9%                |
| MT-RNR1     | rs28358569  | Risk                                 | m. 827 A>G  | Amikacin              | 4.4%                |
|             | rs267606618 | Risk                                 | m. 1095 T>C | Gentamicin            | 0.2%                |
|             | rs267606617 | Risk                                 | m. 1555 A>G | Neomycin              | 0.2%                |
| NAT2        | rs1801280   | Decreased function                   |             | Isoniazid             | 26.4%               |
|             | rs1799930   | Decreased function                   |             | Sulfasalazine         | 16.0%               |
|             | rs1799931   | Decreased function                   |             | Co-trimoxazole        | 4.1%                |
| SLCO1B1     | rs4149056   | Decreased function                   | *5,15,17    | Simvastatin           | 11.2%               |
| TPMT        | rs1142345   | No function                          | *3C         | Azathioprine          | 1.5%                |
| UGT1A1      | rs4148323   | Decreased function                   | *6          | Atazanavir            | 15.1%               |
|             | rs35350960  | Decreased function                   | *27         | Irinotecan            | 2.1%                |
|             | rs887829    | Decreased function                   | *80+*28     | Nilotinib             | 12.1%               |
| VKORC1      | rs9923231   | Decreased warfarin<br>dose           |             | Warfarin              | 89.2%               |

Supplementary Table 7. Consistency of imputed HLA types in parent-child pairs.

|             | ABO   | HLA-A | HLA-B | HLA-C | HLA-DPB1 | HLA-DQB1 | HLA-DRB1 |
|-------------|-------|-------|-------|-------|----------|----------|----------|
| Consistency | 99.9% | 97.8% | 97.4% | 98.9% | 99.2%    | 99.7%    | 97.5%    |

Supplementary Table 8. Accuracy of estimated two-field HLA types with a posterior probability call threshold of 0.

| Data source        | A     | B     | C     | DRB1  | DQB1  | DPB1  |
|--------------------|-------|-------|-------|-------|-------|-------|
| TWBv1<br>(imputed) | 97.5% | 97.7% | 96.6% | 97.0% | 99.8% | 98.3% |
| TWBv2              | 97.4% | 95.3% | 98.1% | 91.4% | 99.4% | 96.1% |

Supplementary Table 9. 2831 rare genetic disease genes with variants on the TWBv2 array.

|        |          |          |          |                 |          |           |               |
|--------|----------|----------|----------|-----------------|----------|-----------|---------------|
| A2ML1  | ACVRL1   | AICDA    | AMN      | AQP5            | ATM      | BBS2      | C12orf57      |
| AAAS   | ADA      | AIP      | AMPD2    | ARCN1           | ATP13A2  | BBS4      | C12orf65      |
| AARS1  | ADA2     | AIPL1    | AMPD3    | ARFGEF1         | ATP1A1   | BBS5      | C15orf41      |
| AASS   | ADAM9    | AIRE     | ANAPC15  | ARFGEF2         | ATP1A3   | BBS7      | C17orf107     |
| ABAT   | ADAMTS10 | AK1      | ANGPTL3  | ARG1            | ATP2A1   | BBS9      | C19orf12      |
| ABCA1  | ADAMTS13 | AK2      | ANK1     | ARHGAP11A -SCG5 | ATP2A2   | BCHE      | C1QA          |
| ABCA12 | ADAMTS17 | AKAP10   | ANK2     | ARHGAP26        | ATP5F1A  | BCKDHA    | C1QTNF3-AMACR |
| ABCA4  | ADAMTS18 | AKAP9    | ANK3     | ARHGAP31        | ATP6V0A2 | BCKDHB    | C1S           |
| ABCB11 | ADAMTS2  | AKR1D1   | ANKH     | ARHGDI1A        | ATP6V0A4 | BCS1L     | C2            |
| ABCB4  | ADAMTSL2 | AKT1     | ANKLE2   | ARHGEF10        | ATP6V1B2 | BEST1     | C2CD3         |
| ABCB6  | ADAMTSL4 | AKT2     | ANKRD11  | ARID1A          | ATP7B    | BHLHA9    | C3            |
| ABCC2  | ADAR     | AKT3     | ANKRD26  | ARID1B          | ATP8B1   | BICC1     | C5            |
| ABCC8  | ADCY1    | ALAD     | ANKS6    | ARID2           | ATPAF2   | BICD2     | C6            |
| ABCC9  | ADCY6    | ALDH18A1 | ANLN     | ARL13B          | ATR      | BIN1      | C7            |
| ABCD3  | ADD3     | ALDH1A3  | ANO10    | ARL14EP         | AUH      | BLK       | C8B           |
| ABCD4  | ADGRE2   | ALDH3A2  | ANO3     | ARL16           | AURKC    | BLM       | C8orf37       |
| ABCG8  | ADGRG1   | ALDH5A1  | ANO5     | ARL2BP          | AUTS2    | BLOC1S6   | C9            |
| ABHD12 | ADGRG6   | ALDH6A1  | ANTXR1   | ARL6            | AVP      | BMP1      | CA1           |
| ABHD5  | ADGRV1   | ALDH7A1  | ANTXR2   | ARL6IP1         | AXIN2    | BMP4      | CA12          |
| ACAD8  | ADK      | ALDOA    | AP2S1    | ARMC4           | B2M      | BMPER     | CA2           |
| ACAD9  | ADNP     | ALDOB    | AP3B1    | ARMC5           | B3GALNT2 | BMPR1A    | CA4           |
| ACADM  | ADSL     | ALG1     | AP3B2    | ARSA            | B3GALT6  | BMPR2     | CA5A          |
| ACADS  | ADSS1    | ALG11    | AP3D1    | ARSB            | B3GAT3   | BMS1      | CA8           |
| ACADSB | AFF4     | ALG12    | AP4B1    | ARV1            | B3GLCT   | BOLA3     | CABP2         |
| ACADVL | AFG3L2   | ALG14    | AP4M1    | ASAH1           | B3GNT6   | BPGM      | CABP4         |
| ACAN   | AFFP     | ALG2     | AP4S1    | ASB10           | B4GALNT1 | BRAF      | CACNA1A       |
| ACAT1  | AGA      | ALG6     | AP5Z1    | ASCC1           | B4GALT7  | BRAT1     | CACNA1C       |
| ACD    | AGBL1    | ALG8     | APC      | ASL             | B4GAT1   | BRCA1     | CACNA1E       |
| ACE    | AGBL5    | ALG9     | APOA1    | ASNS            | B9D1     | BRCA2     | CACNA1H       |
| ACO2   | AGK      | ALK      | APOA1-AS | ASPA            | B9D2     | BRD7      | CACNB2        |
| ACOX1  | AGL      | ALMS1    | APOA5    | ASPH            | BAAT     | BRF1      | CACNB4        |
| ACOX2  | AGPAT2   | ALOX12B  | APOB     | ASPM            | BAG3     | BRIP1     | CAD           |
| ACP4   | AGPS     | ALOXE3   | APOC2    | ASS1            | BANF1    | BSCL2     | CALM1         |
| ACP5   | AGRN     | ALPL     | APOC3    | ASXL1           | BAP1     | BSND      | CALM2         |
| ACTA1  | AGT      | ALS2     | APOE     | ASXL2           | BARD1    | BTD       | CALR          |
| ACTA2  | AGXT     | ALX1     | APOL1    | ASXL3           | BAX      | BVES      | CANT1         |
| ACTB   | AGXT2    | ALX3     | APPL1    | ATF6            | BBIP1    | C10orf105 | CAPN1         |
| ACTG1  | AHCY     | ALX4     | APRT     | ATIC            | BBS1     | C11orf65  | CAPN3         |
| ACTN2  | AHDC1    | AMH      | APTX     | ATL1            | BBS10    | C12orf4   | CAPN5         |
| ACVR2B | AHI1     | AMHR2    | AQP1     | ATL3            | BBS12    | C12orf43  | CARD10        |

|          |            |          |        |            |           |         |         |
|----------|------------|----------|--------|------------|-----------|---------|---------|
| CARD11   | CD164      | CEACAM16 | CHKB   | CNTN2      | COQ4      | CSRP3   | CYP7B1  |
| CARD14   | CD19       | CEL      | CHMP2B | CNTN4      | COQ7      | CST3    | D2HGDH  |
| CARD9    | CD207      | CENPE    | CHN1   | CNTNAP1    | COQ8A     | CSTA    | DAG1    |
| CARMIL2  | CD247      | CENPF    | CHRM3  | CNTNAP2    | COQ8B     | CSTB    | DARS2   |
| CARTPT   | CD27       | CENPJ    | CHRNA1 | COA3       | COQ9      | CTC1    | DBH     |
| CASP10   | CD36       | CEP104   | CHRNA2 | COA6       | CORIN     | CTCF    | DBH-AS1 |
| CASP8    | CD3D       | CEP120   | CHRNA4 | COA8       | CORO1A    | CTH     | DBT     |
| CASQ2    | CD3E       | CEP135   | CHRN1  | COASY      | COX10     | CTHRC1  | DCAF8   |
| CASR     | CD3G       | CEP152   | CHRN2  | COG4       | COX14     | CTLA4   | DCC     |
| CAST     | CD40       | CEP164   | CHRNA1 | COG8       | COX15     | CTNNA1  | DCDC2   |
| CASTOR3  | CD46       | CEP290   | CHRNE  | COL10A1    | COX20     | CTNNA3  | DCHS1   |
| CAT      | CD59       | CEP41    | CHST14 | COL11A1    | COX6A1    | CTNNB1  | DCLRE1C |
| CATSPER1 | CD79B      | CEP55    | CHST3  | COL11A2    | COX6B1    | CTNS    | DCN     |
| CAV1     | CD8A       | CEP57    | CHST6  | COL12A1    | COX8A     | CTPS1   | DCPS    |
| CAV3     | CDAN1      | CEP63    | CHSY1  | COL13A1    | CPAMD8    | CTSA    | DCTN1   |
| CBL      | CDC14A     | CEP78    | CHUK   | COL17A1    | CPLANE1   | CTSC    | DCXR    |
| CBLIF    | CDC42      | CEP83    | CIB2   | COL1A1     | CPT1A     | CTSD    | DDB2    |
| CBS      | CDC45      | CERKL    | CIDEC  | COL1A2     | CPT1C     | CTSF    | DDC     |
| CBX2     | CDC6       | CERS3    | CIITA  | COL25A1    | CPT2      | CTSK    | DDC-AS1 |
| CC2D1A   | CDC73      | CETP     | CIT    | COL27A1    | CR2       | CUBN    | DDHD2   |
| CC2D2A   | CDCA3      | CFAP298  | CKAP2L | COL2A1     | CRADD     | CUL3    | DDOST   |
| CCBE1    | CDCA7      | CFAP53   | CLCN1  | COL3A1     | CRB1      | CUL7    | DDR2    |
| CCDC114  | CDCA7L     | CFB      | CLCN2  | COL4A1     | CRB2      | CWF19L1 | DDX11   |
| CCDC115  | CDH1       | CFC1     | CLCNKA | COL4A2     | CREBBP    | CXCR4   | DDX41   |
| CCDC151  | CDH23      | CFD      | CLCNKB | COL4A2-AS1 | CRPPA     | CYB5A   | DDX58   |
| CCDC174  | CDH23-AS1  | CFH      | CLDN14 | COL4A4     | CRPPA-AS1 | CYB5R3  | DDX59   |
| CCDC39   | CDH3       | CFHR5    | CLDN19 | COL5A1     | CRTAP     | CYBA    | DEAF1   |
| CCDC40   | CDHR1      | CFI      | CLMP   | COL5A2     | CRX       | CYC1    | DENND3  |
| CCDC47   | CDK4       | CFL2     | CLN3   | COL6A1     | CRYAA     | CYCS    | DENND5A |
| CCDC65   | CDK5       | CFTR     | CLN5   | COL6A2     | CRYAB     | CYLD    | DEPDC5  |
| CCDC88A  | CDK5RAP2   | CFTR-AS1 | CLN6   | COL6A3     | CRYBB1    | CYP11A1 | DES     |
| CCDC88C  | CDK6       | CHAMP1   | CLN8   | COL7A1     | CRYBB2    | CYP11B1 | DGAT1   |
| CCM2     | CDKAL1     | CHAT     | CLPB   | COL8A2     | CRYBB3    | CYP11B2 | DGKE    |
| CCN6     | CDKN1B     | CHCHD10  | CLPP   | COL9A1     | CRYGA     | CYP17A1 | DGUOK   |
| CCND1    | CDKN1C     | CHCHD2   | CLRN1  | COL9A2     | CRYM      | CYP19A1 | DHCR24  |
| CCND2    | CDKN2A     | CHD2     | CNGA3  | COL9A3     | CSF1R     | CYP1B1  | DHCR7   |
| CCNH     | CDKN2B-AS1 | CHD4     | CNGB1  | COLEC11    | CSF3R     | CYP21A2 | DHDDS   |
| CCNO     | CDON       | CHD7     | CNGB3  | COLQ       | CSNK1D    | CYP24A1 | DHFR    |
| CCT7     | CDSN       | CHD8     | CNNM2  | COMP       | CSNK2A1   | CYP27A1 | DHH     |
| CD151    | CDT1       | CHEK2    | CNNM4  | COQ2       | CSPP1     | CYP4F22 | DHODH   |

|           |          |          |           |           |           |          |             |
|-----------|----------|----------|-----------|-----------|-----------|----------|-------------|
| DHTKD1    | DNMT3A   | DYNC2H1  | ELN-AS1   | ERMARD    | FANCA     | FGFR3    | FUCA1       |
| DIABLO    | DNMT3B   | DYNC2LI1 | ELOVL4    | ESCO2     | FANCC     | FGFR4    | FUS         |
| DIAPH1    | DOCK2    | DYRK1A   | ELOVL5    | ESPN      | FANCE     | FH       | FUT1        |
| DICER1    | DOCK6    | DYRK1B   | ELP1      | ESR1      | FANCF     | FIBP     | FUZ         |
| DIPK1A    | DOCK7    | DYSF     | ELP2      | ESRRB     | FANCG     | FIG4     | FXN         |
| DIS3L2    | DOCK8    | EARS2    | ELP4      | ETFA      | FANCI     | FKBP10   | FXYD6-FXYD2 |
| DLD       | DOLK     | EBF3     | EMG1      | ETFB      | FANCM     | FKBP14   | FZD4        |
| DLL3      | DONSON   | ECE1     | EML1      | ETFDH     | FAR1      | FKRP     | FZD6        |
| DLL4      | DPAGT1   | ECEL1    | EMP2      | ETHE1     | FARS2     | FKTN     | G6PC        |
| DLX3      | DPM1     | ECHS1    | ENG       | ETV6      | FAS       | FLAD1    | G6PC3       |
| DLX5      | DPM2     | ECM1     | ENPP1     | EVC2      | FASLG     | FLCN     | GAA         |
| DMGDH     | DPM3     | EDARADD  | ENTPD5    | EXOSC3    | FASTKD2   | FLG      | GABRA1      |
| DMP1      | DPRX     | EDC3     | EOGT      | EXOSC8    | FAT4      | FLNB     | GABRB1      |
| DMXL2     | DPY19L2  | EDN1     | EP300     | EXT1      | FBLN5     | FLNC     | GABRB3      |
| DNA2      | DPYD     | EDN3     | EPAS1     | EXT2      | FBN1      | FLNC-AS1 | GABRG2      |
| DNAAF1    | DPYS     | EDNRB    | EPB41     | EYA1      | FBN2      | FLRT3    | GAL         |
| DNAAF2    | DRAM2    | EEF1A2   | EPB41L4A  | EYA4      | FBP1      | FLT3     | GALC        |
| DNAAF3    | DRC1     | EEF2     | EPB42     | EYS       | FBXL3     | FLT4     | GALE        |
| DNAAF4    | DRD4     | EFEMP2   | EPCAM     | EZH2      | FBXL4     | FLVCR1   | GALK1       |
| DNAAF5    | DSC2     | EFTUD2   | EPG5      | F10       | FBXO31    | FLVCR2   | GALNS       |
| DNAH1     | DSC3     | EGF      | EPHB4     | F11       | FBXO38    | FMO3     | GALNT14     |
| DNAH11    | DSE      | EGFR     | EPHX2     | F12       | FBXO7     | FN1      | GALNT3      |
| DNAH5     | DSG1     | EGFR-AS1 | EPM2A     | F13A1     | FECH      | FOLR1    | GALNT4      |
| DNAH8     | DSG1-AS1 | EGLN1    | EPS8      | F13B      | FERMT1    | FOXC1    | GALT        |
| DNAH8-AS1 | DSG2     | EGR2     | EPX       | F2        | FERMT3    | FOXC2    | GAMT        |
| DNAI1     | DSG2-AS1 | EHBP1    | ERBB2     | F5        | FEZF1     | FOXE1    | GAN         |
| DNAI2     | DSG4     | EHHADH   | ERBB3     | F7        | FEZF1-AS1 | FOXF1    | GANAB       |
| DNAJB2    | DSP      | EHMT1    | ERBB4     | FA2H      | FGA       | FOXG1    | GARS1       |
| DNAJB5    | DSPP     | EIF2AK1  | ERCC1     | FADD      | FGB       | FOXL2    | GAS8        |
| DNAJB6    | DST      | EIF2AK3  | ERCC2     | FAH       | FGD4      | FOXN1    | GATA3       |
| DNAJC19   | DTNA     | EIF2AK4  | ERCC3     | FAM111A   | FGF10     | FOXP2    | GATA4       |
| DNAJC21   | DTNBP1   | EIF2B1   | ERCC4     | FAM111B   | FGF14     | FOXRED1  | GATA6       |
| DNAJC5    | DUOX2    | EIF2B2   | ERCC5     | FAM120AOS | FGF17     | FRAS1    | GATAD1      |
| DNAJC6    | DUOXA2   | EIF2B3   | ERCC6     | FAM126A   | FGF20     | FREM1    | GATAD2B     |
| DNAL1     | DUPD1    | EIF4A3   | ERCC6L2   | FAM161A   | FGF23     | FREM2    | GATM        |
| DNASE1    | DUSP6    | EIF4G1   | ERCC8     | FAM167A   | FGF3      | FRRS1L   | GBA         |
| DNM1      | DVL1     | ELANE    | ERCC8-AS1 | FAM20A    | FGF8      | FSHB     | GBA2        |
| DNM1L     | DVL3     | ELMO2    | ERF       | FAM20C    | FGF9      | FSHR     | GBE1        |
| DNM2      | DYM      | ELMOD3   | ERLIN1    | FAM83H    | FGFR1     | FTL      | GCDH        |
| DNMT1     | DYNC1H1  | ELN      | ERLIN2    | FAM98C    | FGFR2     | FTO      | GCH1        |

|        |          |          |           |         |         |          |            |
|--------|----------|----------|-----------|---------|---------|----------|------------|
| GCK    | GLRX5    | GPT2     | HBB       | HOXA13  | IER3IP1 | IMPG2    | IYD        |
| GCLC   | GLUD1    | GPX4     | HBD       | HOXA2   | IFIH1   | INF2     | JAG1       |
| GCM2   | GLUL     | GREM2    | HBG2      | HOXB1   | IFITM5  | ING1     | JAGN1      |
| GCSH   | GLYCTK   | GRHL2    | HCN1      | HOXB13  | IFNAR2  | INPP5E   | JAK1       |
| GDAP1  | GM2A     | GRHL3    | HCN4      | HOXD13  | IFNGR1  | INPPL1   | JAK3       |
| GDF1   | GMNN     | GRHPR    | HCRT      | HPCA    | IFNGR2  | INS      | JAM3       |
| GDF2   | GMPPB    | GRIN1    | HDC       | HPD     | IFT122  | INS-IGF2 | JMJD8      |
| GDF3   | GNA11    | GRIN2A   | HELLS     | HPGD    | IFT140  | INSL3    | JUP        |
| GDF5   | GNAI3    | GRIN2B   | HEPACAM   | HPS1    | IFT172  | INSL6    | KAAG1      |
| GDNF   | GNAL     | GRIN2D   | HERC1     | HPS3    | IFT27   | INSR     | KALRN      |
| GFAP   | GNAO1    | GRIP1    | HERC2     | HPS4    | IFT43   | INVS     | KANK2      |
| GFER   | GNAQ     | GRM6     | HES7      | HPS5    | IFT52   | IQCB1    | KANSL1     |
| GFI1   | GNAS     | GRN      | HEXA      | HPS6    | IFT74   | IQCE     | KARS1      |
| GFI1B  | GNAT1    | GRXCR1   | HEXB      | HPSE2   | IFT81   | IRAK4    | KAT6A      |
| GFM2   | GNAT2    | GRXCR2   | HFE       | HR      | IGF1    | IRF1     | KAT6B      |
| GFPT1  | GNB1     | GSC      | HFM1      | HRAS    | IGF2R   | IRF4     | KATNB1     |
| GGCX   | GNB3     | GSDME    | HGD       | HSD11B1 | IGHMBP2 | IRF5     | KCNA1      |
| GH1    | GNB4     | GSS      | HGF       | HSD11B2 | IGSF3   | IRF6     | KCNA2      |
| GHR    | GNE      | GTF2E2   | HGSNAT    | HSD17B3 | IHH     | IRF7     | KCNA5      |
| GHRHR  | GNMT     | GTF2H5   | HIBCH     | HSD17B4 | IKBKB   | IRF8     | KCNB1      |
| GIGYF2 | GNPAT    | GTF2IRD1 | HIKESHI   | HSD3B2  | IKZF1   | IRGM     | KCNC1      |
| GIPC3  | GNPTAB   | GUCA1A   | HINT1     | HSD3B7  | IL10RA  | IRX5     | KCNC3      |
| GJA1   | GNPTG    | GUCY1A1  | HIVEP2    | HSPA1A  | IL10RB  | ISCA2    | KCND3      |
| GJA3   | GNRH1    | GUCY2C   | HJV       | HSPA1L  | IL11RA  | ISCU     | KCNE1      |
| GJA5   | GNRHR    | GUCY2D   | HK1       | HSPA9   | IL12RB1 | ISG15    | KCNE2      |
| GJA8   | GNS      | GUF1     | HLCS      | HSPB1   | IL13    | ITCH     | KCNH1      |
| GJB2   | GORAB    | GUSB     | HMBS      | HSPB8   | IL17F   | ITGA2B   | KCNH2      |
| GJB3   | GOSR2    | GYG1     | HMGCL     | HSPD1   | IL17RA  | ITGA3    | KCNJ1      |
| GJB4   | GP1BA    | GYS1     | HMGCS2    | HSPG2   | IL17RC  | ITGA7    | KCNJ10     |
| GJB6   | GP1BB    | GYS2     | HNF1A     | HTR1A   | IL1B    | ITGA8    | KCNJ11     |
| GJC2   | GP9      | H6PD     | HNF1B     | HTRA1   | IL1RN   | ITGB2    | KCNJ2      |
| GLB1   | GPC6     | HACE1    | HNF4A     | HTRA2   | IL21R   | ITGB3    | KCNJ5      |
| GLDC   | GPC6-AS2 | HADH     | HNMT      | HYAL1   | IL2RA   | ITGB4    | KCNJ6      |
| GLDN   | GPD1     | HADHB    | HNRNPA1   | HYDIN   | IL36RN  | ITGB6    | KCNK3      |
| GLI2   | GPI      | HAMP     | HNRNPA2B1 | IBA57   | IL4R    | ITK      | KCNK9      |
| GLI3   | GPIHBP1  | HARS1    | HNRNPK    | ICAM4   | IL7R    | ITPA     | KCNMA1     |
| GLIS2  | GPNMB    | HARS2    | HOGA1     | ICK     | ILDR1   | ITPKC    | KCNMA1-AS1 |
| GLMN   | GPR179   | HAVCR2   | HOMER2    | IDH2    | IMPAD1  | ITPR1    | KCNN4      |
| GLRA1  | GPR68    | HAX1     | HOXA1     | IDH3B   | IMPDH1  | ITSN1    | KCNQ1      |
| GLRB   | GPSM2    | HBA2     | HOXA11    | IDUA    | IMPG1   | IVD      | KCNQ1-AS1  |



|          |        |              |              |              |             |          |         |
|----------|--------|--------------|--------------|--------------|-------------|----------|---------|
| KCNQ1OT1 | KLHL41 | LARGE1       | LOC101448202 | LOC105375087 | LOXL1       | MAP2K1   | MEFV    |
| KCNQ2    | KLHL7  | LARS2        | LOC101927188 | LOC105375258 | LPAR6       | MAP2K2   | MEGF10  |
| KCNQ3    | KLK4   | LBR          | LOC101927318 | LOC105375554 | LPIN1       | MAP3K1   | MEGF8   |
| KCNQ4    | KMT2A  | LCA5         | LOC101927513 | LOC105375668 | LPIN2       | MAP3K7   | MEN1    |
| KCNT1    | KMT2B  | LCAT         | LOC101927751 | LOC105375669 | LPL         | MAPK1    | MERTK   |
| KCNV2    | KMT2D  | LCK          | LOC101928008 | LOC105376294 | LRIG2       | MAPK7    | MESP2   |
| KCTD1    | KNL1   | LCT          | LOC101928462 | LOC105378311 | LRIT3       | MAPKBP1  | MEST    |
| KCTD17   | KPTN   | LDB3         | LOC101928477 | LOC105378353 | LRMDA       | MAPRE2   | MET     |
| KCTD3    | KRAS   | LDLR         | LOC101928861 | LOC105378437 | LRP2        | MAPT     | METTL23 |
| KCTD7    | KRIT1  | LDLRAP1      | LOC101929270 | LOC105378525 | LRP4        | MARS1    | MFAP5   |
| KERA     | KRT1   | LDLR-AS1     | LOC101930593 | LOC105379077 | LRP5        | MARS2    | MFN2    |
| KHDC3L   | KRT12  | LEMD3        | LOC102723409 | LOC105379841 | LRP6        | MARVELD2 | MFRP    |
| KHK      | KRT13  | LEP          | LOC102723439 | LOC107984190 | LRP8        | MASP1    | MFSD2A  |
| KIAA0556 | KRT14  | LEPR         | LOC102723566 | LOC107984334 | LRPAP1      | MAT1A    | MFSD8   |
| KIAA0586 | KRT16  | LG11         | LOC102723692 | LOC107984500 | LRPPRC      | MATN3    | MGAT2   |
| KIAA0753 | KRT17  | LHB          | LOC102723869 | LOC107984585 | LRRCC6      | MATN4    | MGME1   |
| KIF11    | KRT18  | LHCGR        | LOC102723945 | LOC107984670 | LRRCC1      | MATR3    | MGP     |
| KIF14    | KRT2   | LHFPL5       | LOC102723999 | LOC107984763 | LRRK2       | MAX      | MHRT    |
| KIF1A    | KRT25  | LHX3         | LOC102724262 | LOC107985009 | LRSAM1      | MBD5     | MIB1    |
| KIF1B    | KRT3   | LIAS         | LOC105369543 | LOC107985023 | LRTOMT      | MBL2     | MICU1   |
| KIF1C    | KRT4   | LIFR         | LOC105369668 | LOC107985154 | LTA         | MBOAT7   | MINPP1  |
| KIF21A   | KRT5   | LIG4         | LOC105369696 | LOC107985290 | LTBP2       | MC2R     | MIP     |
| KIF22    | KRT6A  | LIMS2        | LOC105369745 | LOC107985291 | LTBP3       | MC4R     | MIR6886 |
| KIF2A    | KRT6B  | LINS1        | LOC105369752 | LOC107986432 | LTBP4       | MCCC1    | MIR96   |
| KIF5A    | KRT6C  | LIPA         | LOC105369759 | LOC107986469 | LURAP1L-AS1 | MCCC2    | MITF    |
| KIF5C    | KRT71  | LIPC         | LOC105369798 | LOC107986528 | LYRM7       | MCEE     | MKKS    |
| KIF7     | KRT8   | LIPH         | LOC105369801 | LOC107986608 | LYZ         | MCFD2    | MKRN3   |
| KIFBP    | KRT83  | LITAF        | LOC105370042 | LOC107986633 | LZTFL1      | MCIDAS   | MKS1    |
| KIRREL2  | KRT9   | LMBR1        | LOC105370538 | LOC107987102 | LZTR1       | MCM2     | MLC1    |
| KISS1    | KYNU   | LMBRD1       | LOC105370627 | LOC107987115 | LZTS1       | MCM8     | MLH1    |
| KISS1R   | L2HGDH | LMF1         | LOC105370752 | LOC112267902 | MAD1L1      | MCM9     | MLH3    |
| KITLG    | LACC1  | LMNA         | LOC105371049 | LOC112267905 | MAD2L2      | MCOLN1   | MLPH    |
| KIZ      | LAMA1  | LMNB2        | LOC105371251 | LOC112267935 | MAF         | MCPH1    | MLYCD   |
| KLF1     | LAMA2  | LMOD3        | LOC105371492 | LOC112268118 | MAFB        | MDH2     | MMAB    |
| KLF11    | LAMA3  | LMX1B        | LOC105371493 | LOC112268182 | MAG         | MECOM    | MMACHC  |
| KLF6     | LAMB1  | LOC100130744 | LOC105371567 | LOC115308161 | MAGEL2      | MED13L   | MMADHC  |
| KLHDC8B  | LAMB2  | LOC100287944 | LOC105371858 | LOC647211    | MAK         | MED17    | MME     |
| KLHL10   | LAMB3  | LOC100506071 | LOC105372146 | LONP1        | MALT1       | MED23    | MMP13   |
| KLHL3    | LAMC2  | LOC100506321 | LOC105372273 | LOX          | MAN1B1      | MEF2A    | MMP14   |
| KLHL40   | LAMC3  | LOC100507346 | LOC105372797 | LOXHD1       | MAN2B1      | MEF2C    | MMP2    |

|          |        |         |        |        |          |        |         |
|----------|--------|---------|--------|--------|----------|--------|---------|
| MMP21    | MVD    | NAXE    | NEXN   | NR1H3  | ORAI1    | PCDH15 | PEX7    |
| MMUT     | MVK    | NBAS    | NF1    | NR1H4  | ORC1     | PCNA   | PFKM    |
| MNX1-AS2 | MXI1   | NBEAL2  | NF2    | NR2E3  | ORC4     | PCNT   | PFN1    |
| MOCOS    | MYBPC1 | NBN     | NFIX   | NR2F1  | ORC6     | PCSK1  | PGAM2   |
| MOCS1    | MYBPC3 | NCF1    | NFKB2  | NR2F2  | OSBPL2   | PCSK9  | PGAP1   |
| MOCS2    | MYC    | NCF2    | NFKBIA | NR3C1  | OSGEP    | PCYT1A | PGAP2   |
| MOG      | MYCN   | NCF4    | NFU1   | NR3C2  | OSMR     | PCYT2  | PGAP3   |
| MOGS     | MYD88  | NCLN    | NHLRC1 | NR5A1  | OSTM1    | PDCD10 | PGBD3   |
| MORC2    | MYEF2  | NCSTN   | NHP2   | NRAS   | OTOA     | PDE10A | PGM1    |
| MPC1     | MYH11  | NDE1    | NIN    | NRL    | OTOF     | PDE11A | PGM3    |
| MPDU1    | MYH14  | NDRG1   | NIPA1  | NRXN1  | OTOG     | PDE3A  | PHGDH   |
| MPDZ     | MYH2   | NDST1   | NIPAL4 | NSD1   | OTOGL    | PDE4D  | PHKB    |
| MPI      | MYH3   | NDUFA13 | NIPBL  | NSMCE3 | OTOP2    | PDE6A  | PHKG2   |
| MPL      | MYH6   | NDUFA2  | NKX2-1 | NSUN2  | OTULIN   | PDE6B  | PHOX2A  |
| MPLKIP   | MYH7   | NDUFA6  | NKX2-5 | NSUN6  | OTX2     | PDE6C  | PHYH    |
| MPO      | MYH9   | NDUFAF1 | NKX2-6 | NT5C2  | OVOL2    | PDE6D  | PHYKPL  |
| MPV17    | MYL2   | NDUFAF2 | NLRC4  | NT5C3A | OXCT1    | PDE6H  | PI4KA   |
| MPZ      | MYL3   | NDUFAF4 | NLRP1  | NTF4   | P2RX2    | PDE8B  | PIBF1   |
| MPZL2    | MYL4   | NDUFAF5 | NLRP3  | NTHL1  | P3H1     | PDGFRB | PIEZO1  |
| MRAP     | MYLK   | NDUFAF6 | NLRP7  | NTRK1  | P4HB     | PDHB   | PIEZO2  |
| MRE11    | MYMK   | NDUFS1  | NMNAT1 | NTRK2  | PACRG    | PDHX   | PIGG    |
| MRI1     | MYNN   | NDUFS2  | NNT    | NUBPL  | PAFAH1B1 | PDP1   | PIGN    |
| MS4A2    | MYO15A | NDUFS3  | NOBOX  | NUDT2  | PAH      | PDSS1  | PIGO    |
| MSH2     | MYO18B | NDUFS4  | NOC3L  | NUP107 | PALB2    | PDSS2  | PIGT    |
| MSH3     | MYO1E  | NDUFS6  | NOD2   | NUP155 | PAM16    | PDX1   | PIGV    |
| MSH6     | MYO3A  | NDUFS7  | NODAL  | NUP205 | PANK2    | PDYN   | PIGW    |
| MSR1     | MYO5B  | NDUFS8  | NOG    | NUP62  | PAPSS2   | PEPD   | PIH1D2  |
| MSRB3    | MYO6   | NDUFV1  | NOP10  | NUP93  | PARK7    | PER3   | PIK3CA  |
| MSX2     | MYO7A  | NDUFV2  | NOTCH1 | NUP98  | PARN     | PET100 | PIK3CD  |
| MTFMT    | MYOC   | NEB     | NOTCH2 | OAT    | PAX2     | PEX1   | PIK3R1  |
| MTHFR    | MYOM1  | NECTIN1 | NOTCH3 | OBSL1  | PAX3     | PEX10  | PIK3R2  |
| MTMR10   | MYOT   | NECTIN4 | NPC1   | OCA2   | PAX4     | PEX11B | PINK1   |
| MTMR2    | MYOZ2  | NEDD4L  | NPC2   | OCLN   | PAX6     | PEX12  | PIP5K1C |
| MTOR     | MYPN   | NEFH    | NPHP1  | ODAPH  | PAX8     | PEX13  | PITX1   |
| MTPAP    | MYT1L  | NEFL    | NPHP4  | OPA1   | PAX9     | PEX14  | PITX2   |
| MTR      | NADK2  | NEK2    | NPHS1  | OPA3   | PC       | PEX16  | PKD1    |
| MTRR     | NAGA   | NEK8    | NPPA   | OPCML  | PCARE    | PEX2   | PKD1L1  |
| MTTP     | NAGLU  | NEK9    | NPR2   | OPLAH  | PCBD1    | PEX26  | PKD2    |
| MUSK     | NAGS   | NEU1    | NPRL2  | OPN1SW | PCCA     | PEX5   | PKHD1   |
| MUTYH    | NALCN  | NEUROG3 | NPRL3  | OPTN   | PCDH12   | PEX6   | PKLR    |

|           |          |         |          |         |            |            |          |
|-----------|----------|---------|----------|---------|------------|------------|----------|
| PKP1      | POLK     | PRKCSH  | PTPRQ    | RBM20   | RNASEH1    | RSPO4      | SCN4B    |
| PKP2      | POLR1A   | PRKDC   | PTRH2    | RBM28   | RNASEH2A   | RSPRY1     | SCN5A    |
| PLA2G6    | POLR1C   | PRKG1   | PTS      | RBM8A   | RNASEH2B   | RTEL1      | SCN8A    |
| PLA2G7    | POLR1D   | PRKN    | PUF60    | RBP4    | RNASEH2C   | RTN2       | SCN9A    |
| PLCB4     | POLR2F   | PRLR    | PURA     | RBPJ    | RNASEL     | RTN4IP1    | SCNN1A   |
| PLCE1     | POLR3A   | PRNP    | PUS1     | RCBTB1  | RNASET2    | RTN4R      | SCNN1B   |
| PLCE1-AS1 | POLR3B   | PROC    | PUS3     | RD3     | RNF125     | RTTN       | SCNN1G   |
| PLCG1-AS1 | POMC     | PRODH   | PXDN     | RDH11   | RNF168     | RUBCN      | SCO1     |
| PLCG2     | POMGNT1  | PROKR2  | PYCR1    | RDH12   | RNF170     | RUNX1      | SCP2     |
| PLEC      | POMGNT2  | PROM1   | PYCR2    | RDH5    | RNF213-AS1 | RUNX2      | SCYL1    |
| PLEKHG5   | POMK     | PROP1   | PYGL     | RDX     | RNF216     | RXYLT1     | SDCCAG8  |
| PLEKHM1   | POMT1    | PROS1   | PYGM     | RECQL   | RNF6       | RXYLT1-AS1 | SDHA     |
| PLG       | POMT2    | PRPF3   | PYROXD1  | RECQL4  | RNU4ATAC   | RYR1       | SDHAF2   |
| PLK4      | PON1     | PRPF31  | QDPR     | REEP1   | ROBO3      | RYR2       | SDHB     |
| PLN       | POR      | PRPF4   | RAB18    | REEP2   | ROBO4      | S1PR2      | SDHC     |
| PLOD1     | POU4F3   | PRPF6   | RAB23    | REEP6   | ROGDI      | SACS       | SDHD     |
| PLOD2     | PPARG    | PRPF8   | RAB27A   | RELA    | ROR2       | SAG        | SEC23A   |
| PLOD3     | PPIB     | PRPH2   | RAB28    | RELN    | RORB       | SALL1      | SEC23B   |
| PLPBP     | PPOX     | PRRT2   | RAB33B   | RELT    | RORC       | SALL2      | SEC24D   |
| PMFBP1    | PPP1CB   | PRRX1   | RAB3GAP1 | REN     | RP1        | SALL4      | SEC61A1  |
| PMM2      | PPP1R15B | PRSS1   | RAB3GAP2 | RERE    | RP1L1      | SAMD9      | SEC63    |
| PMP22     | PPP2R1A  | PRSS12  | RAB7A    | RET     | RPE65      | SAMD9L     | SECISBP2 |
| PMPCA     | PPP2R1B  | PRSS56  | RAC2     | RETREG1 | RPGRIP1    | SAMHD1     | SELENON  |
| PMS2      | PPP2R5D  | PRUNE1  | RAD21    | RFT1    | RPGRIP1L   | SAR1B      | SEMA4A   |
| PMVK      | PPT1     | PRX     | RAD50    | RFX5    | RPIA       | SARDH      | SEPTIN12 |
| PNKP      | PRCD     | PSAP    | RAD51    | RFX6    | RPL21P4    | SARS2      | SEPTIN9  |
| PNP       | PRDM12   | PSAT1   | RAD51C   | RFXANK  | RPL26      | SASH1      | SERAC1   |
| PNPLA1    | PRDM16   | PSEN1   | RAD51D   | RFXAP   | RPS10      | SATB2      | SERPINA1 |
| PNPLA2    | PRDM5    | PSEN2   | RAG1     | RGS9    | RPS17      | SBDS       | SERPINA6 |
| PNPLA6    | PRDM6    | PSMB8   | RAG2     | RHAG    | RPS19      | SBF1       | SERPINB6 |
| PNPLA8    | PRF1     | PSPH    | RAI1     | RHBDF2  | RPS24      | SBF2       | SERPINB7 |
| PNPO      | PRICKLE1 | PSTPIP1 | RAPSN    | RHO     | RPS26      | SC5D       | SERPINB8 |
| PNPT1     | PRKACA   | PTCH1   | RARB     | RIN2    | RPS29      | SCARF2     | SERPINC1 |
| POC1B     | PRKACG   | PTCH2   | RARS1    | RIPK4   | RPS7       | SCN11A     | SERPIND1 |
| POFUT1    | PRKAG2   | PTDSS1  | RARS2    | RIPOR2  | RPSA       | SCN1A      | SERPINF1 |
| POGZ      | PRKAG3   | PTEN    | RASA1    | RIT1    | RRM2B      | SCN1B      | SERPINF2 |
| POLD1     | PRKAR1A  | PTGIS   | RAX      | RLBP1   | RSPH1      | SCN2B      | SERPING1 |
| POLE      | PRKCD    | PTH     | RB1      | RMND1   | RSPH3      | SCN3A      | SERPINH1 |
| POLG      | PRKCG    | PTHLH   | RBBP8    | RMRP    | RSPH4A     | SCN3B      | SERPINI1 |
| POLG2     | PRKCH    | PTPN11  | RBCK1    | RNASE4  | RSPH9      | SCN4A      | SETBP1   |

|          |          |             |          |         |           |         |            |
|----------|----------|-------------|----------|---------|-----------|---------|------------|
| SETD1A   | SLC12A5  | SLC34A1     | SMAD4    | SPAG1   | STAR      | TAC3    | TEAD1      |
| SETD2    | SLC12A6  | SLC34A3     | SMAD9    | SPAG8   | STAT1     | TACR3   | TECPR2     |
| SETD5    | SLC13A5  | SLC35A3     | SMARCA2  | SPARC   | STAT2     | TACSTD2 | TECR       |
| SETX     | SLC17A5  | SLC35C1     | SMARCA4  | SPART   | STAT3     | TAF2    | TECTA      |
| SEZ6     | SLC17A9  | SLC35D1     | SMARCAL1 | SPAST   | STAT5B    | TAF6    | TEK        |
| SF3B4    | SLC18A3  | SLC37A4     | SMARCB1  | SPATA6L | STEAP3    | TALDO1  | TENM3      |
| SFRP4    | SLC19A1  | SLC38A8     | SMARCD2  | SPATA7  | STIL      | TANGO2  | TENM4      |
| SFTPA2   | SLC1A2   | SLC39A14    | SMARCE1  | SPDL1   | STIM1     | TARDBP  | TERC       |
| SFTPB    | SLC1A3   | SLC39A4     | SMC3     | SPECC1L | STING1    | TARID   | TERT       |
| SFTPC    | SLC20A2  | SLC39A5     | SMCHD1   | SPEG    | STK11     | TAS2R16 | TEX15      |
| SGCA     | SLC22A12 | SLC3A1      | SMG9     | SPG11   | STK4      | TAT     | TF         |
| SGCB     | SLC22A18 | SLC40A1     | SMN1     | SPG21   | STOX1     | TBATA   | TFAM       |
| SGCD     | SLC22A5  | SLC45A2     | SMN2     | SPG7    | STRA6     | TBC1D20 | TFAP2A     |
| SGCE     | SLC24A4  | SLC46A1     | SMO      | SPINK1  | STRC      | TBC1D24 | TFAP2A-AS2 |
| SGCG     | SLC25A13 | SLC4A1      | SMOC1    | SPINK5  | STT3A     | TBC1D7  | TFAP2B     |
| SGSH     | SLC25A15 | SLC4A11     | SMOC2    | SPINT2  | STT3B     | TBCD    | TFG        |
| SH2B3    | SLC25A19 | SLC52A2     | SMPD1    | SPR     | STUB1     | TBCE    | TFR2       |
| SH3PXD2B | SLC25A20 | SLC52A3     | SNAP25   | SPRED1  | STX11     | TBK1    | TG         |
| SH3TC2   | SLC25A22 | SLC5A1      | SNAP29   | SPRTN   | STX1B     | TBL1XR1 | TGDS       |
| SHANK2   | SLC25A3  | SLC5A2      | SNCA     | SPRY4   | STX7      | TBX1    | TGFB1      |
| SHANK3   | SLC25A32 | SLC5A5      | SNCB     | SPTA1   | STXBP1    | TBX18   | TGFB2      |
| SHH      | SLC25A38 | SLC5A7      | SNORD118 | SPTAN1  | STXBP2    | TBX19   | TGFB3      |
| SHOC2    | SLC25A4  | SLC6A17     | SNRNP200 | SPTB    | SUCLA2    | TBX20   | TGFB1      |
| SHPK     | SLC25A42 | SLC6A19     | SNRPB    | SPTBN2  | SUCLG1    | TBX3    | TGFBR      |
| SI       | SLC25A46 | SLC6A3      | SNRPE    | SPTLC1  | SUFU      | TBX4    | TGFBR1     |
| SIAE     | SLC26A2  | SLC6A5      | SNTA1    | SPTLC2  | SUGCT     | TBX5    | TGIF1      |
| SIGMAR1  | SLC26A3  | SLC6A9      | SNX10    | SPTLC3  | SUMF1     | TBX6    | TGM1       |
| SIK1     | SLC26A4  | SLC7A14     | SNX14    | SQSTM1  | SUN5      | TBXT    | TGM5       |
| SIL1     | SLC26A5  | SLC7A7      | SOBP     | SRC     | SUOX      | TCAP    | TGM6       |
| SIN3A    | SLC26A8  | SLC7A9      | SOD1     | SRCAP   | SURF1     | TCF12   | TH         |
| SIX1     | SLC27A4  | SLC9A9      | SOHLH1   | SRD5A2  | SYCE1     | TCF3    | TH2LCRR    |
| SIX3     | SLC28A1  | SLCO1B1     | SON      | SRD5A3  | SYCE2     | TCF4    | THAP1      |
| SIX5     | SLC29A3  | SLCO2A1     | SOS1     | SRGAP1  | SYCP3     | TCIRG1  | THBD       |
| SIX6     | SLC2A1   | SLFN14      | SOS2     | SRI     | SYNE1     | TCN2    | THCAT158   |
| SKI      | SLC2A10  | SLITRK1     | SOST     | ST14    | SYNE1-AS1 | TCOF1   | THOC6      |
| SLC10A2  | SLC2A2   | SLITRK6     | SOX10    | ST3GAL3 | SYNE4     | TCTN1   | THRA       |
| SLC11A2  | SLC2A9   | SLMO2-ATP5E | SOX11    | ST3GAL5 | SYNGAP1   | TCTN2   | THSD1      |
| SLC12A1  | SLC30A10 | SLURP1      | SOX18    | STAC3   | SYNJ1     | TCTN3   | TIA1       |
| SLC12A3  | SLC30A2  | SLX4        | SOX5     | STAMPB  | SZT2      | TDP1    | TIMM50     |
| SLC12A4  | SLC33A1  | SMAD3       | SOX9     | STAP1   | TAB2      | TDP2    | TIMP3      |

|           |          |         |         |           |         |           |  |
|-----------|----------|---------|---------|-----------|---------|-----------|--|
| TINF2     | TNIK     | TRIM44  | TUBA1A  | UROC1     | WDPCP   | YARS1     |  |
| TJP2      | TNNC1    | TRIO    | TUBA3E  | UROD      | WDR19   | YARS2     |  |
| TK2       | TNNI2    | TRIOBP  | TUBA4A  | UROS      | WDR34   | YME1L1    |  |
| TLE6      | TNNI3    | TRIP11  | TUBA8   | USB1      | WDR35   | YY1AP1    |  |
| TLL1      | TNNT1    | TRIP4   | TUBB    | USH1C     | WDR36   | ZAP70     |  |
| TLR2      | TNNT2    | TRMU    | TUBB1   | USH1G     | WDR45B  | ZBTB16    |  |
| TLR5      | TNNT3    | TRPA1   | TUBB2A  | USH2A     | WDR60   | ZBTB18    |  |
| TMC1      | TNPO3    | TRPC3   | TUBB2B  | USP53     | WDR62   | ZBTB24    |  |
| TMCO1     | TNXB     | TRPC6   | TUBB3   | USP8      | WDR66   | ZBTB42    |  |
| TMEM107   | TOP3A    | TRPM1   | TUBB4A  | UTP14C    | WDR72   | ZC3H14    |  |
| TMEM126A  | TOPORS   | TRPM4   | TUBB8   | VAC14     | WDR73   | ZDHHC24   |  |
| TMEM126B  | TOR1AIP1 | TRPM6   | TUBG1   | VAC14-AS1 | WDR81   | ZEB1      |  |
| TMEM127   | TP53     | TRPM7   | TUBGCP4 | VANGL1    | WDR93   | ZEB2      |  |
| TMEM138   | TP53BP1  | TRPS1   | TUBGCP6 | VAPB      | WEE2    | ZFP57     |  |
| TMEM165   | TP63     | TRPV3   | TULP1   | VAR2S     | WFS1    | ZFPM2-AS1 |  |
| TMEM199   | TPCN2    | TRPV4   | TUSC3   | VAX1      | WHRN    | ZFYVE26   |  |
| TMEM216   | TPH2     | TSC1    | TWIST1  | VCAN-AS1  | WNK1    | ZIC1      |  |
| TMEM231   | TPI1     | TSC2    | TWIST2  | VCL       | WNK4    | ZIC2      |  |
| TMEM237   | TPK1     | TSEN15  | TWNK    | VCP       | WNT1    | ZMPSTE24  |  |
| TMEM240   | TPM1     | TSEN2   | TXNDC15 | VEGFA     | WNT10A  | ZMYND10   |  |
| TMEM256   | TPM2     | TSEN34  | TXNL4A  | VEGFC     | WNT10B  | ZMYND11   |  |
| TMEM43    | TPM3     | TSEN54  | TYK2    | VHL       | WNT3    | ZMYND15   |  |
| TMEM67    | TPO      | TSHB    | TYMP    | VIPAS39   | WNT4    | ZNF335    |  |
| TMEM70    | TPP1     | TSHR    | TYR     | VPS11     | WNT5A   | ZNF408    |  |
| TMEM92    | TPRN     | TSHZ1   | TYROBP  | VPS13A    | WNT7A   | ZNF469    |  |
| TMEM98    | TPTE2P5  | TSPAN12 | TYRP1   | VPS13B    | WRAP53  | ZNF627    |  |
| TMEM99    | TRAC     | TSPYL1  | UBE3A   | VPS13C    | WRN     | ZNF644    |  |
| TMIE      | TRAF3IP1 | TTBK1   | UBE3B   | VPS33A    | WT1     | ZNF687    |  |
| TMPRSS15  | TRAF3IP2 | TTBK2   | UBIAD1  | VPS33B    | WVOX    | ZNHIT3    |  |
| TMPRSS3   | TRAIP    | TTC19   | UBN1    | VPS35     | XDH     | ZP1       |  |
| TMPRSS6   | TRAPPC11 | TTC21B  | UBR1    | VPS45     | XIRP1   | ZSWIM6    |  |
| TMTC3     | TRAPPC3  | TTC25   | UCP3    | VPS53     | XPA     |           |  |
| TNC       | TRAPPC9  | TTC37   | UMOD    | VRK1      | XPC     |           |  |
| TNF       | TRDN     | TTC7A   | UNC13D  | VSX1      | XPNPEP3 |           |  |
| TNFAIP3   | TREM2    | TTC8    | UNC45B  | VSX2      | XRCC2   |           |  |
| TNFRSF11A | TRHR     | TTI2    | UNG     | VWA3B     | XRCC3   |           |  |
| TNFRSF11B | TRIM14   | TTLL5   | UPB1    | VWF       | XRCC4   |           |  |
| TNFRSF13B | TRIM2    | TTN     | UQCC3   | WAC       | XYLT1   |           |  |
| TNFRSF1A  | TRIM32   | TTPA    | UQCRQ   | WASHC4    | XYLT2   |           |  |
| TNFSF11   | TRIM37   | TTR     | URAHP   | WASHC5    | YAP1    |           |  |
